# Supplementary material for: Silencing of the potato StNAC103 gene enhances the accumulation of suberin polyester and associated wax in tuber skin
Source: J Exp Bot. 2016 Aug 12;67(18):5415–27. doi: 10.1093/jxb/erw305 (PMC5049391; doi:10.1093/jxb/erw305)
Supplement: Supplementary Figures [file erw305_suppl_supplementary_figures_s1_s8.pdf]

## **Supplementary information (SI) appendix**

### **Silencing of the potato tuber skin-induced *StNAC103* gene enhances accumulation of suberin and suberin-associated wax**

Roger Verdaguer<sup>‡</sup>, Marçal Soler<sup>‡</sup>, Olga Serra, Aïda Garrote, Sandra Fernández, Dolors Company-Arumí, Enriqueta Anticó, Marisa Molinas, Mercè Figueras<sup>\*</sup>.

<sup>‡</sup> these authors contributed equally to this work

<sup>\*</sup> Author for correspondence: merce.figueras@udg.edu

#### **Supplementary Information (SI) contains:**

SI Figures 8

SI Table 1

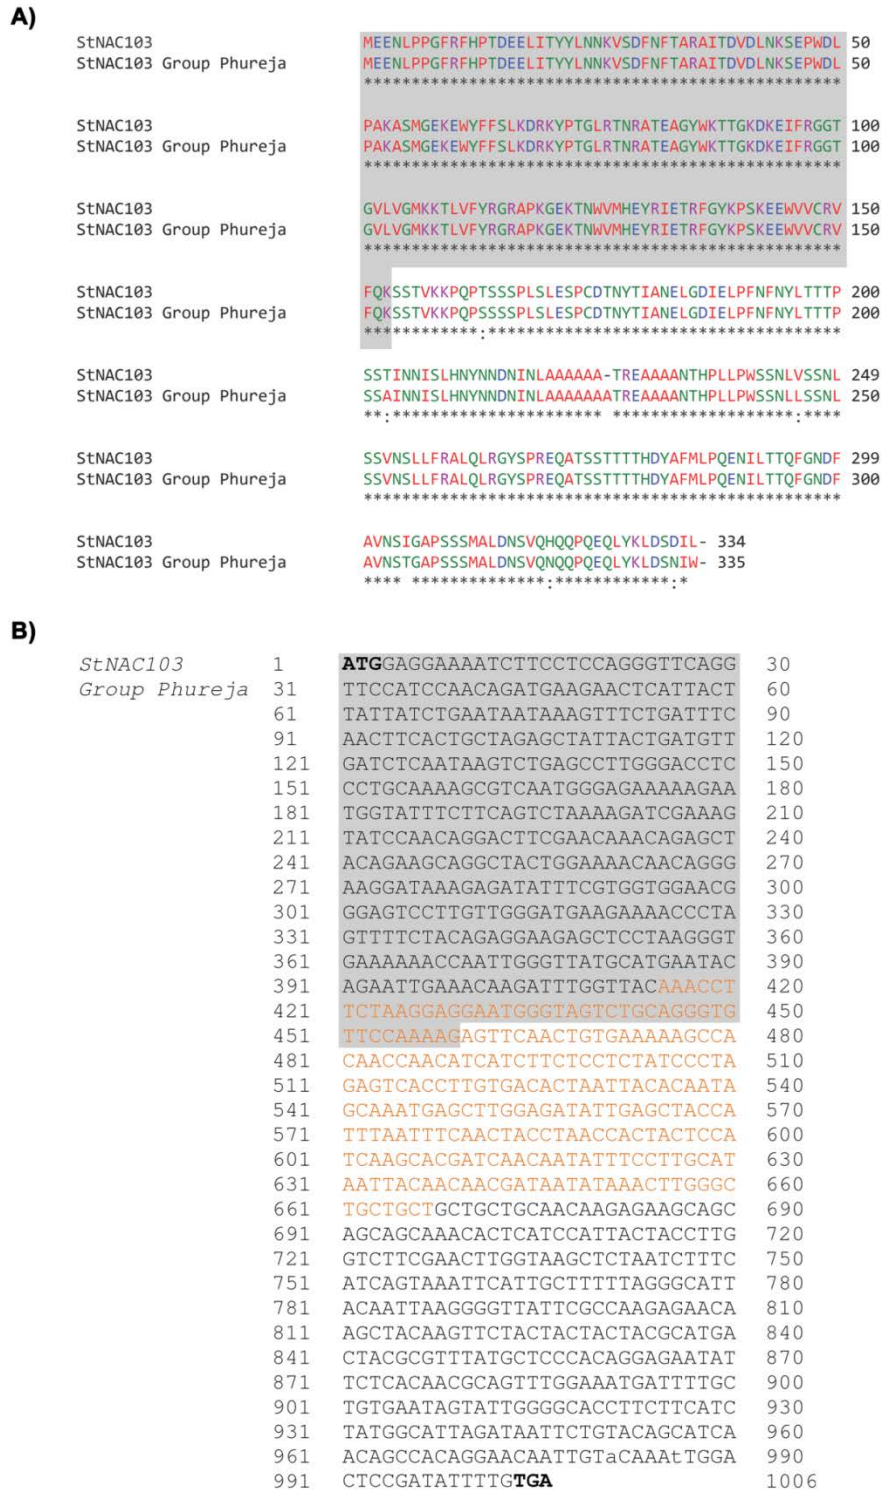

**Supplementary Fig. 1. (A)** Amino acid sequence alignment between the sequence obtained of *StNAC103* from *S. tuberosum* Group Tuberosum (KT598221) and from *S. tuberosum* Group Phureja (PGSC0003DMP400009522). The NAC domain is at N-terminal end and is shown shadowed in grey. The TAR region is the remaining protein sequence at the C-terminal end. **(B)** *StNAC103* Group Tuberosum nucleotide sequence showing the sequence used to generate the *StNAC103-RNAi* hairpins is highlighted in orange characters. NAC domain is also shadowed in grey.

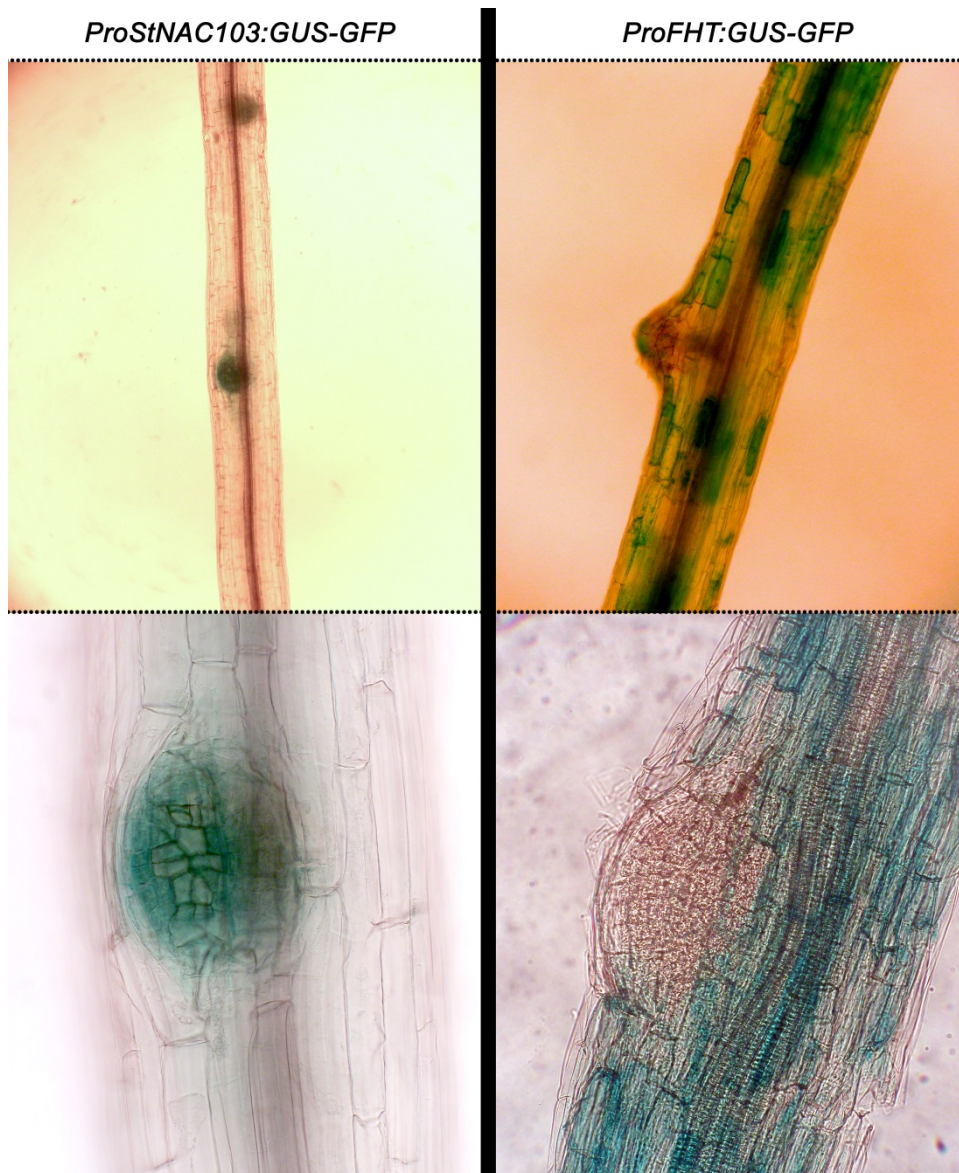

**Supplementary Fig. 2.** *StNAC103* and *FHT* promoter activity in potato primary root. Plants were grown in hydroponics and roots were GUS stained in parallel.

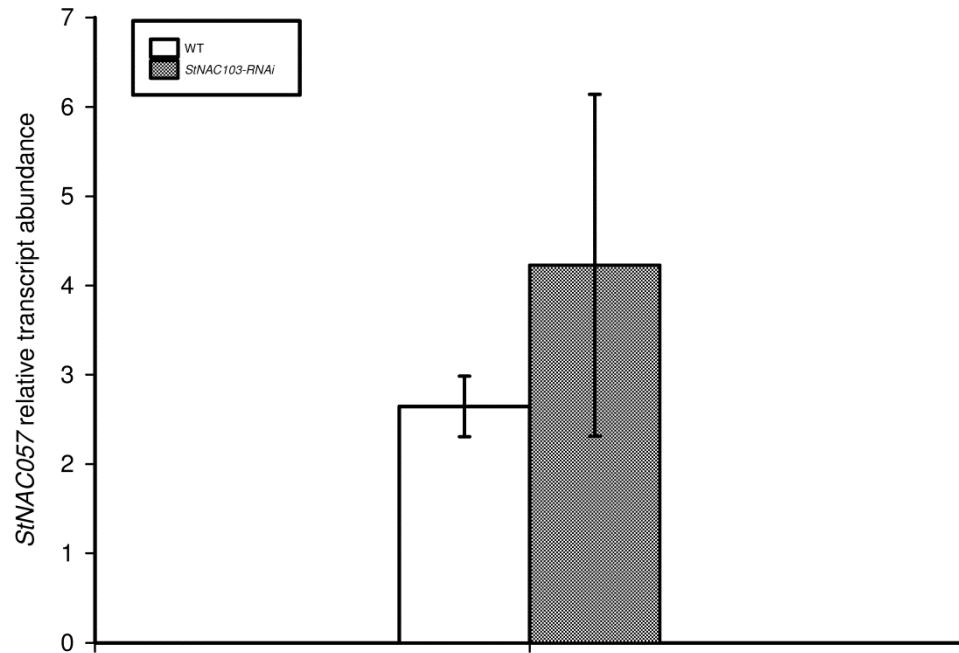

**Supplementary Fig. 3.** The relative transcript abundance of *StNAC057* in *StNAC103-RNAi* and wild-type periderms was analyzed by microfluidics qPCR. Values are the mean  $\pm$  SD of wild-type (four biological replicates) and two independent transformation events for *StNAC103-RNAi*, lines 43 and 45 (five and four biological replicates, respectively). The *StNAC057* transcript accumulation did not show statistically significant differences between *StNAC103-RNAi* and wild-type periderms (t test;  $p=0.14$ ).

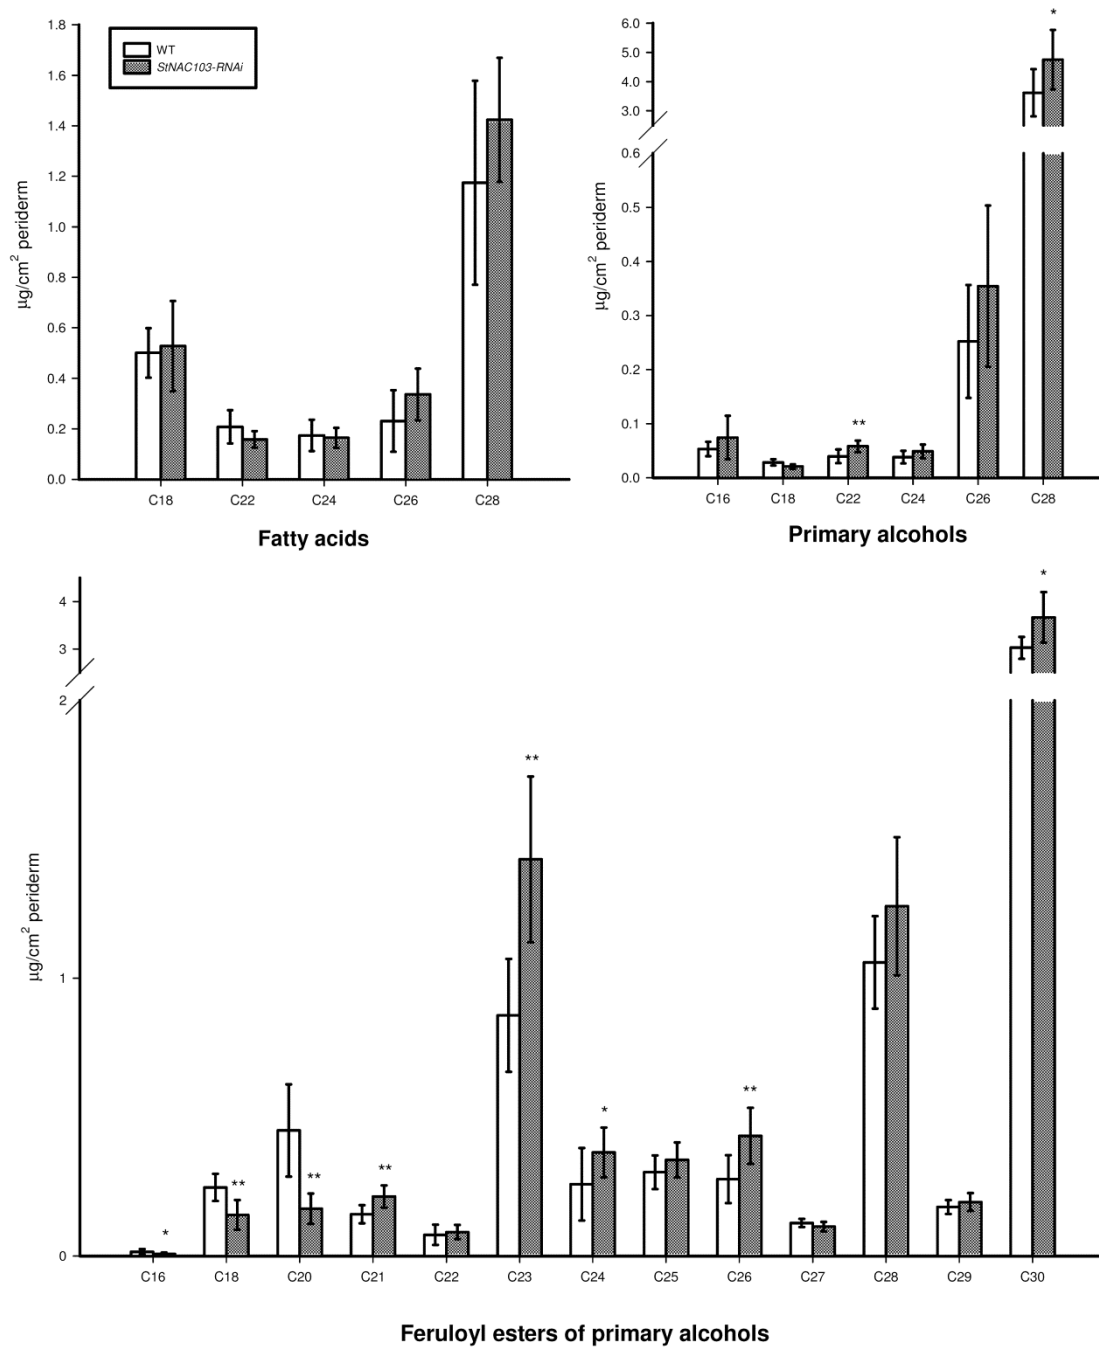

**Supplementary Fig. 4.** Chemical composition of wax fatty acids, primary alcohols and feruloyl esters of primary alcohols in *StNAC103-RNAi* and wild-type periderms. Values are the mean  $\pm$  SD of wild-type (n=5) and two independent transformation events for *StNAC103-RNAi* (n=4, n=3). Statistical significant differences (p<0.05) are denoted with one asterisk whereas pronounced statistical significant differences (p<0.01) are shown with two asterisks.

### *StNAC103-RNAi* lines

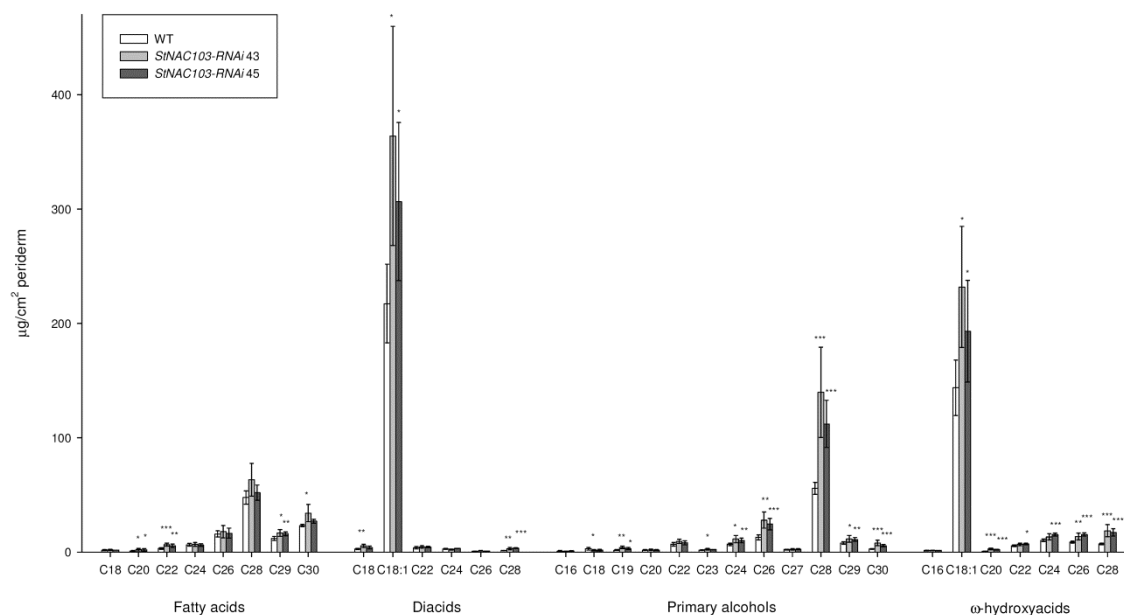

**Supplementary Fig. 5.** Wax chemical composition plotted for the different lines of *StNAC103-RNAi* and wild-type analyzed. Values are the mean  $\pm$  SD of wild-type (n=5), *StNAC103-RNAi* 43 (n=4), *StNAC103-RNAi* 45 (n=3). Statistical significant differences ( $p < 0.05$ ) are denoted with one asterisk whereas pronounced statistical significant differences ( $p < 0.01$  and  $p < 0.001$ ) are shown with two and three asterisks respectively.

### *StNAC103-RNAi* lines

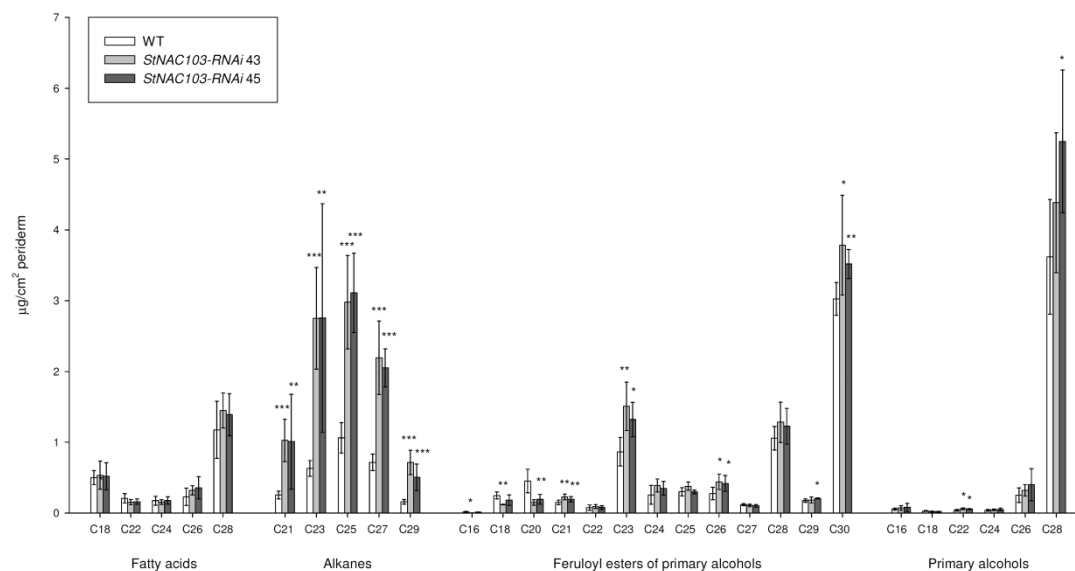

**Supplementary Fig. 6.** Suberin chemical composition for the different lines of *StNAC103-RNAi* and wild-type analyzed. Values are the mean  $\pm$  SD of wild type (n=5), *StNAC103-RNAi* 43 (n=4), *StNAC103-RNAi* 45 (n=3). Statistical significant differences ( $p < 0.05$ ) are denoted with one asterisk whereas pronounced statistical significant differences ( $p < 0.01$  and  $p < 0.001$ ) are shown with two and three asterisks respectively.

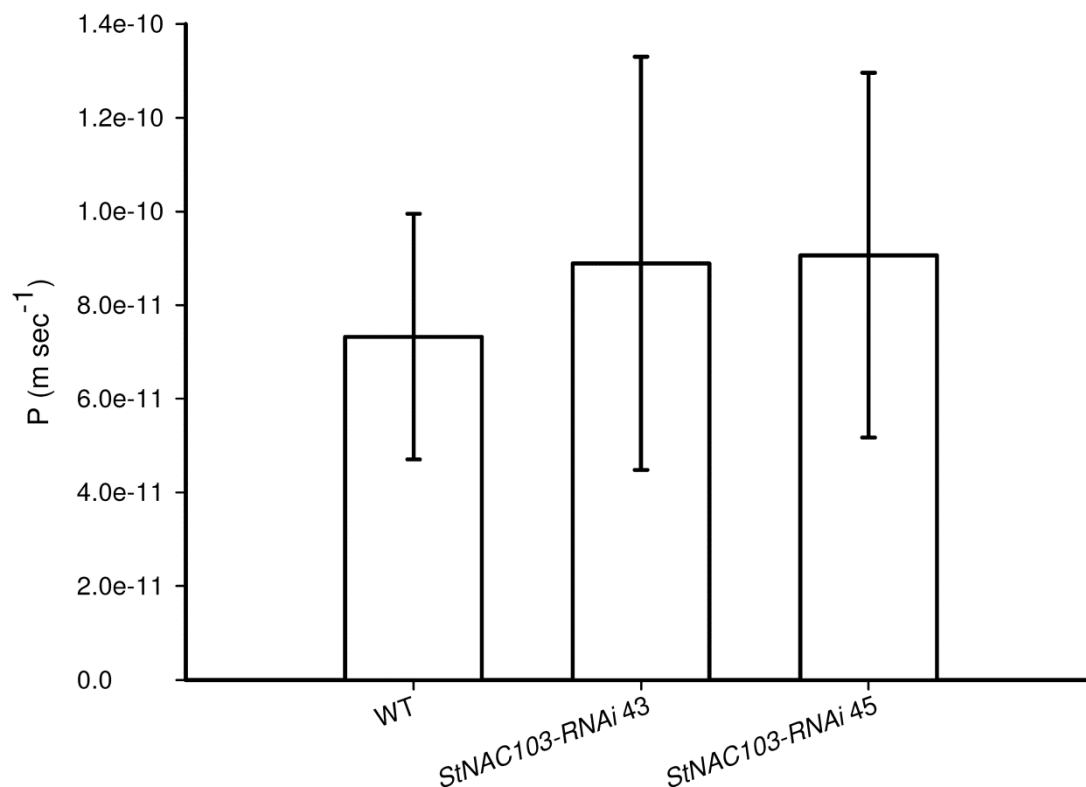

**Supplementary Fig. 7.** Periderm water permeance in *StNAC103-RNAi* and wild-type lines. Periderms were isolated from 39-d-stored tubers. Values are the mean  $\pm$  SD of 3-7 biological replicates.

|                                 |                                                                                                                                                                                                                                                                                                                                              |
|---------------------------------|----------------------------------------------------------------------------------------------------------------------------------------------------------------------------------------------------------------------------------------------------------------------------------------------------------------------------------------------|
| StNAC103 (99-134)               | <u>G</u> <u>T</u> <u>G</u> <u>V</u> <u>L</u> <u>V</u> <u>G</u> <u>M</u> <u>K</u> <u>K</u> <u>T</u> <u>L</u> <u>V</u> <u>F</u> <u>Y</u> <u>R</u> <u>G</u> <u>R</u> <u>A</u> <u>P</u> <u>K</u> <u>G</u> <u>E</u> <u>K</u> <u>T</u> <u>N</u> <u>W</u> <u>V</u> <u>M</u> <u>H</u> <u>E</u> <u>Y</u> <u>R</u> <u>L</u> <u>I</u> <u>-</u> <u>E</u> |
| AtNAC2_AT3G15510.1 (111-146)    | DG NQ K <u>V</u> <u>G</u> <u>V</u> <u>K</u> <u>K</u> <u>A</u> <u>L</u> <u>V</u> <u>F</u> <u>Y</u> <u>S</u> <u>G</u> <u>K</u> <u>P</u> <u>P</u> <u>K</u> <u>G</u> <u>V</u> <u>K</u> <u>S</u> <u>D</u> <u>W</u> <u>I</u> <u>M</u> <u>H</u> <u>E</u> <u>Y</u> <u>R</u> <u>L</u> <u>I</u> <u>E</u>                                               |
| ATAF1_AT1G01720.1 (98-133)      | G L P K P <u>V</u> <u>G</u> <u>I</u> <u>K</u> <u>K</u> <u>A</u> <u>L</u> <u>V</u> <u>F</u> <u>Y</u> <u>A</u> <u>G</u> <u>K</u> <u>A</u> <u>P</u> <u>K</u> <u>G</u> <u>E</u> <u>K</u> <u>T</u> <u>N</u> <u>W</u> <u>I</u> <u>M</u> <u>H</u> <u>E</u> <u>Y</u> <u>R</u> <u>L</u> <u>A</u> <u>D</u>                                             |
| GmNAC20_ACC66314.1 (100-135)    | G K P K P <u>V</u> <u>G</u> <u>I</u> <u>K</u> <u>K</u> <u>A</u> <u>L</u> <u>V</u> <u>F</u> <u>Y</u> <u>A</u> <u>G</u> <u>K</u> <u>A</u> <u>P</u> <u>K</u> <u>G</u> <u>V</u> <u>K</u> <u>T</u> <u>N</u> <u>W</u> <u>I</u> <u>M</u> <u>H</u> <u>E</u> <u>Y</u> <u>R</u> <u>L</u> <u>A</u> <u>D</u>                                             |
| SNAC_LOC_Os01g66120.1 (100-135) | G S P K P <u>V</u> <u>A</u> <u>I</u> <u>K</u> <u>K</u> <u>A</u> <u>L</u> <u>V</u> <u>F</u> <u>Y</u> <u>A</u> <u>G</u> <u>K</u> <u>A</u> <u>P</u> <u>K</u> <u>G</u> <u>E</u> <u>K</u> <u>T</u> <u>N</u> <u>W</u> <u>I</u> <u>M</u> <u>H</u> <u>E</u> <u>Y</u> <u>R</u> <u>L</u> <u>A</u> <u>D</u>                                             |
| GmNAC11_ACC66315.1 (105-140)    | G A Q E S <u>V</u> <u>G</u> <u>V</u> <u>K</u> <u>K</u> <u>A</u> <u>L</u> <u>V</u> <u>F</u> <u>Y</u> <u>K</u> <u>G</u> <u>R</u> <u>P</u> <u>P</u> <u>K</u> <u>G</u> <u>V</u> <u>K</u> <u>T</u> <u>N</u> <u>W</u> <u>I</u> <u>M</u> <u>H</u> <u>E</u> <u>Y</u> <u>R</u> <u>L</u> <u>V</u> <u>D</u>                                             |
| RD26_AT4G27410.3 (123-158)      | A D G R R <u>V</u> <u>G</u> <u>I</u> <u>K</u> <u>K</u> <u>A</u> <u>L</u> <u>V</u> <u>F</u> <u>Y</u> <u>A</u> <u>G</u> <u>K</u> <u>A</u> <u>P</u> <u>K</u> <u>G</u> <u>T</u> <u>K</u> <u>T</u> <u>N</u> <u>W</u> <u>I</u> <u>M</u> <u>H</u> <u>E</u> <u>Y</u> <u>R</u> <u>L</u> <u>I</u> <u>E</u>                                             |
| NST1_AT2G46770.1 (111-146)      | S N G R R I <u>G</u> <u>M</u> <u>R</u> <u>K</u> <u>T</u> <u>L</u> <u>V</u> <u>F</u> <u>Y</u> <u>K</u> <u>G</u> <u>R</u> <u>A</u> <u>P</u> <u>H</u> <u>G</u> <u>Q</u> <u>K</u> <u>S</u> <u>D</u> <u>W</u> <u>I</u> <u>M</u> <u>H</u> <u>E</u> <u>Y</u> <u>R</u> <u>L</u> <u>D</u> <u>D</u>                                                    |

**Supplementary Fig. 8.** Alignment of the NARD-like sequences from StNAC103 (99-134), GmNAC35\_ACC66316.1 (101-136), AtNAC2\_AT3G15510.1 (111-146), ATAF1\_AT1G01720.1 (98-133), GmNAC20\_ACC66314.1 (100-135), SNAC\_LOC\_Os01g66120.1 (100-135), GmNAC11\_ACC66315.1 (105-140), RD26\_AT4G27410.3 (123-158), NST1\_AT2G46770.1 (111-146) proteins. Identical residues identified by Hao *et al.*, (2010) were underlined.

**Hao Y-J, Song Q-X, Chen H-W, Zou H-F, Wei W, Kang X-S, Ma B, Zhang W-K, Zhang J-S, Chen S-Y.** 2010. Plant NAC-type transcription factor proteins contain a NARD domain for repression of transcriptional activation. *Planta* **232**, 1033–1043.
